# Supplementary material
Source: PubMed Central journal article supplement (PMC6274591)
Supplement: NIHMS954368-supplement-1.pdf [file NIHMS954368-supplement-1.pdf]

## Supplemental Material

### Supplementary Methods

In the survey, subjects were presented with the following short scenario (“your patient” or appropriate pronoun was substituted in the survey for clinicians) prior to answering survey questions:

*“Imagine that you come to the hospital complaining that your nose has been running with yellow mucus for the past 7 days. In addition, your nose has also been stuffed, causing mild discomfort. Finally, your eyes are watering, your throat is sore, you’ve been having a cough, and your muscles have been aching. You have tried taking Tylenol but it hasn’t helped. The doctor examines you). The doctor tells you that you have a low fever, but everything seems normal on your physical exam. Your blood pressure and heart rate are normal, and your lungs also sound normal.*

In Studies 1 and 2, the scenario was presented from the perspective of the patient, whereas in Study 3, the scenario was presented from the provider’s perspective.

### Regression Analysis Model Selection

In order to control model complexity while still accounting for the possibility of interactions between gists, we used stepwise model selection to choose logistic regression models predicting prior use and expectations for antibiotics in the online sample. For each dependent variable (prior use of, or expectations for, antibiotics), we used three separate stepwise techniques to find candidate best-fitting models, as follows:

- 1) Starting with a null model, we used stepwise forward model selection to progressively add demographic variables, latent factors, and their interactions.

- 2) Starting with a saturated model, we used stepwise backwards elimination to progressively remove demographic variables, latent factors, and their interactions.
- 3) Starting with a model including only main effects but no interactions, we used both stepwise forward model selection and stepwise backwards elimination to examine the effects of adding interaction terms and removing main effects.

Each of these three procedures yielded a best-fitting model, as determined by the regression model with the lowest Akaike Information Criterion (AIC) score. Finally, we selected among the there resulting models by selecting the one with the lowest AIC. Results of this selection procedure are shown in Table S12 and Table S13. Results did not differ qualitatively between stepwise selection procedures (i.e., more complex model parameters were not significant after controlling for multiple comparisons).

Table S1

*Item Loadings Based on an Exploratory Factor Analysis of Study 1 with Varimax Rotation for 46 Survey Items*

| Item Short Form                                           | 1 (14%) | 2 (11%) | 3 (11%) | 4 (9%) | 5 (6%) | 6 (4%) |
|-----------------------------------------------------------|---------|---------|---------|--------|--------|--------|
| <b>Germs are Germs</b>                                    |         |         |         |        |        |        |
| Yes against viruses                                       |         |         |         |        | 0.87   |        |
| No against viruses                                        |         |         |         |        | -0.82  |        |
| Yes against bacteria                                      |         |         |         |        | -0.59  |        |
| No against bacteria                                       |         |         |         |        | 0.54   |        |
| Viral can turn into bacterial                             |         |         |         |        |        |        |
| Viral can't turn into bacterial                           |         |         |         |        |        |        |
| <b>Why Not Take a Risk? (Antibiotics Can't Hurt)</b>      |         |         |         |        |        |        |
| Don't know about ABX, but it can't hurt/ABX can't hurt pt | 0.69    |         |         |        |        |        |
| Might not help, but better safe than sorry                | 0.76    |         |         |        |        |        |
| Take ABX just in case                                     | 0.74    |         |         |        |        |        |
| ABX might help and can't hurt                             | 0.69    |         |         |        |        |        |

---

|                                       |      |
|---------------------------------------|------|
| It can't hurt                         | 0.6  |
| Better safe than sorry                | 0.75 |
| Might as well take a chance           | 0.69 |
| Better safe than sorry, so take ABX   | 0.71 |
| Might not work but why take a chance? | 0.71 |

---

**Antibiotics Don't Help**

|                                             |      |
|---------------------------------------------|------|
| Might not help, so better not to take ABX   | 0.68 |
| Don't take ABX if they don't make me better | 0.48 |
| ABX don't help and can hurt                 | 0.69 |
| ABX might not be safe                       | 0.55 |
| Should NOT take a chance                    | 0.51 |
| Better safe than sorry, so no ABX           | 0.65 |
| Might not work so why take ABX?             | 0.62 |

---

**Side Effects (Antibiotics Can Hurt)**

|                                               |       |
|-----------------------------------------------|-------|
| Don't know, but (I/pt) might get side effects | 0.7   |
| Don't know but (I/pt) won't get side effects  | -0.62 |

---

---

|                                                            |      |       |
|------------------------------------------------------------|------|-------|
| (I/Pt) might get side effects                              |      | 0.77  |
| (I/Pt) won't get side effects                              |      | -0.72 |
| ABX might have side effects                                |      | 0.8   |
| ABX don't have side effects                                |      | -0.75 |
| Don't know about ABX, but it might hurt/ ABX could hurt pt |      | 0.41  |
| It could hurt                                              | 0.41 | 0.49  |

---

**Antibiotics Help**

|                                 |       |       |
|---------------------------------|-------|-------|
| Yes against germs               |       | 0.59  |
| No against germs                |       | -0.61 |
| (I/Pt) (don't/doesn't) need ABX | 0.41  | -0.45 |
| (I/Pt) need ABX                 |       | 0.59  |
| I know ABX help                 | 0.43  | 0.49  |
| I don't know if ABX help        |       |       |
| ABX will help                   | -0.47 | 0.49  |
| ABX might not help              |       | -0.57 |
| Symptoms go away with ABX       |       | 0.52  |

---

---

Symptoms don't go away with ABX

---

**Antibiotics Should be Taken for Strep Throat**

|               |       |
|---------------|-------|
| Yes for strep | 0.92  |
| No for strep  | -0.88 |

---

**The Doctor Doesn't Believe Me**

|                                              |      |
|----------------------------------------------|------|
| Doctor doesn't believe me/I don't believe pt | 0.43 |
| Doctor takes (me/pt) seriously               |      |

---

**Going to the ER Necessitates Antibiotics**

|                     |  |
|---------------------|--|
| ER means ABX        |  |
| ER doesn't mean ABX |  |

---

*Note.* Factor loadings >0.40 are shown

Table S2

*Item Loadings Based on an Exploratory Factor Analysis of Study 2 with Varimax Rotation for 46 Survey Items*

| Item Short Form                                           | 1 (17%) | 2 (11%) | 3 (9%) | 4 (4%) |
|-----------------------------------------------------------|---------|---------|--------|--------|
| <b>Germs are Germs</b>                                    |         |         |        |        |
| Yes against viruses                                       |         |         |        | -0.69  |
| No against viruses                                        |         |         |        | 0.78   |
| Yes against bacteria                                      |         |         |        |        |
| No against bacteria                                       |         |         |        |        |
| Viral can turn into bacterial                             |         |         |        |        |
| Viral can't turn into bacterial                           |         | 0.41    |        |        |
| <b>Why Not Take a Risk? (Antibiotics Can't Hurt)</b>      |         |         |        |        |
| Don't know about ABX, but it can't hurt/ABX can't hurt pt | 0.72    |         |        |        |
| Might not help, but better safe than sorry                | 0.85    |         |        |        |
| Take ABX just in case                                     | 0.75    |         |        |        |
| ABX might help and can't hurt                             | 0.6     |         | 0.4    |        |
| It can't hurt                                             | 0.57    |         |        |        |

---

|                                       |      |
|---------------------------------------|------|
| Better safe than sorry                | 0.8  |
| Might as well take a chance           | 0.76 |
| Better safe than sorry, so take ABX   | 0.8  |
| Might not work but why take a chance? | 0.45 |

---

**Antibiotics Don't Help**

|                                             |      |
|---------------------------------------------|------|
| Might not help, so better not to take ABX   | 0.7  |
| Don't take ABX if they don't make me better |      |
| ABX don't help and can hurt                 | 0.71 |
| ABX might not be safe                       | 0.76 |
| Should NOT take a chance                    | 0.52 |
| Better safe than sorry, so no ABX           | 0.69 |
| Might not work so why take ABX?             | 0.68 |

---

**Side Effects (Antibiotics Can Hurt)**

|                                               |       |
|-----------------------------------------------|-------|
| Don't know, but (I/pt) might get side effects | -0.49 |
| Don't know but (I/pt) won't get side effects  | 0.5   |
| (I/Pt) might get side effects                 | -0.65 |

---



---

|                                                            |      |       |
|------------------------------------------------------------|------|-------|
| (I/Pt) won't get side effects                              |      | 0.46  |
| ABX might have side effects                                |      | -0.61 |
| ABX don't have side effects                                |      | 0.58  |
| Don't know about ABX, but it might hurt/ ABX could hurt pt | 0.41 |       |
| It could hurt                                              |      |       |

---

**Antibiotics Help**

|                                 |      |       |
|---------------------------------|------|-------|
| Yes against germs               | 0.51 | 0.47  |
| No against germs                |      | -0.49 |
| (I/Pt) (don't/doesn't) need ABX |      | 0.42  |
| (I/Pt) need ABX                 | 0.6  |       |
| I know ABX help                 | 0.62 |       |
| I don't know if ABX help        |      |       |
| ABX will help                   | 0.49 |       |
| ABX might not help              |      | -0.5  |
| Symptoms go away with ABX       | 0.42 |       |
| Symptoms don't go away with ABX |      | 0.65  |

---

---

**Antibiotics Should be Taken for Strep Throat**

Yes for strep

No for strep 0.43

---

**The Doctor Doesn't Believe Me**

Doctor doesn't believe me/I don't believe pt

Doctor takes (me/pt) seriously

---

**Going to the ER Necessitates Antibiotics**

ER means ABX 0.56

ER doesn't mean ABX

---

*Note.* Factor loadings >0.40 are shown

Table S3

*Item Loadings Based on an Exploratory Factor Analysis of Study 3 with Varimax Rotation for 46 Survey Items*

| Item Short Form                                           | 1 (11%) | 2 (11%) | 3 (8%) | 4 (5%) |
|-----------------------------------------------------------|---------|---------|--------|--------|
| <b>Germs are Germs</b>                                    |         |         |        |        |
| Yes against viruses                                       |         |         |        |        |
| No against viruses                                        |         |         |        |        |
| Yes against bacteria                                      |         |         |        |        |
| No against bacteria                                       |         |         |        |        |
| Viral can turn into bacterial                             |         |         |        |        |
| Viral can't turn into bacterial                           |         |         |        |        |
| <b>Why Not Take a Risk? (Antibiotics Can't Hurt)</b>      |         |         |        |        |
| Don't know about ABX, but it can't hurt/ABX can't hurt pt | 0.46    |         |        |        |
| Might not help, but better safe than sorry                |         | 0.76    | 0.41   |        |
| Take ABX just in case                                     |         | 0.62    |        |        |
| ABX might help and can't hurt                             | 0.51    | 0.48    |        |        |
| It can't hurt                                             | 0.55    |         |        |        |

---

|                                       |      |
|---------------------------------------|------|
| Better safe than sorry                | 0.73 |
| Might as well take a chance           | 0.64 |
| Better safe than sorry, so take ABX   | 0.79 |
| Might not work but why take a chance? | 0.59 |

---

**Antibiotics Don't Help**

|                                             |       |
|---------------------------------------------|-------|
| Might not help, so better not to take ABX   | 0.54  |
| Don't take ABX if they don't make me better | 0.55  |
| ABX don't help and can hurt                 | -0.44 |
| ABX might not be safe                       | 0.58  |
| Should NOT take a chance                    | 0.43  |
| Better safe than sorry, so no ABX           | 0.53  |
| Might not work so why take ABX?             |       |

---

**Side Effects (Antibiotics Can Hurt)**

|                                               |       |
|-----------------------------------------------|-------|
| Don't know, but (I/pt) might get side effects | -0.44 |
| Don't know but (I/pt) won't get side effects  | 0.53  |
| (I/Pt) might get side effects                 | -0.76 |

---

---

|                                                            |       |
|------------------------------------------------------------|-------|
| (I/Pt) won't get side effects                              | 0.56  |
| ABX might have side effects                                | -0.66 |
| ABX don't have side effects                                | 0.59  |
| Don't know about ABX, but it might hurt/ ABX could hurt pt | -0.57 |
| It could hurt                                              | -0.73 |

---

### **Antibiotics Help**

No against germs

(I/Pt) (don't/doesn't) need ABX -0.58

(I/Pt) need ABX 0.52

I know ABX help 0.56

I don't know if ABX help

ABX will help 0.7

ABX might not help

Symptoms go away with ABX 0.66

Symptoms don't go away with ABX

---

### **Antibiotics Should be Taken for Strep Throat**

---

Yes for strep

No for strep

---

**The Doctor Doesn't Believe Me**

Doctor doesn't believe me/I don't believe pt

Doctor takes (me/pt) seriously

---

**Going to the ER Necessitates Antibiotics**

ER means ABX -0.44

ER doesn't mean ABX 0.47 0.41

---

*Note.* Factor loadings >0.40 are shown

Table S4

*Item Loadings Based on an Exploratory Factor Analysis of Online Sample with Oblimin Rotation for 46 Survey Items*

| Item Short Form                                           | 1 (19%) | 2 (10%) | 3 (7%) | 4 (7%) | 5 (7%) | 6 (4%) |
|-----------------------------------------------------------|---------|---------|--------|--------|--------|--------|
| <b>GermS are GermS</b>                                    |         |         |        |        |        |        |
| Yes against viruses                                       |         |         | 0.95   |        |        |        |
| No against viruses                                        |         |         | -0.9   |        |        |        |
| Yes against bacteria                                      |         |         | -0.61  |        |        |        |
| No against bacteria                                       |         |         | 0.52   |        |        |        |
| Viral can turn into bacterial                             |         |         | 0.43   |        |        |        |
| Viral can't turn into bacterial                           |         |         |        |        |        |        |
| <b>Why Not Take a Risk? (Antibiotics Can't Hurt)</b>      |         |         |        |        |        |        |
| Don't know about ABX, but it can't hurt/ABX can't hurt pt | 0.79    |         |        |        |        |        |
| Might not help, but better safe than sorry                | 0.93    |         |        |        |        |        |
| Take ABX just in case                                     | 0.91    |         |        |        |        |        |
| ABX might help and can't hurt                             | 0.8     |         |        |        |        |        |

---

|                                       |      |
|---------------------------------------|------|
| It can't hurt                         | 0.66 |
| Better safe than sorry                | 0.89 |
| Might as well take a chance           | 0.81 |
| Better safe than sorry, so take ABX   | 0.83 |
| Might not work but why take a chance? | 0.9  |

---

**Antibiotics Don't Help**

|                                             |      |
|---------------------------------------------|------|
| Might not help, so better not to take ABX   | 0.59 |
| Don't take ABX if they don't make me better |      |
| ABX don't help and can hurt                 | 0.64 |
| ABX might not be safe                       | 0.51 |
| Should NOT take a chance                    | 0.50 |
| Better safe than sorry, so no ABX           | 0.53 |
| Might not work so why take ABX?             | 0.59 |

---

**Side Effects (Antibiotics Can Hurt)**

|                                               |       |
|-----------------------------------------------|-------|
| Don't know, but (I/pt) might get side effects | 0.75  |
| Don't know but (I/pt) won't get side effects  | -0.61 |

---



---

|                                                            |       |
|------------------------------------------------------------|-------|
| (I/Pt) might get side effects                              | 0.82  |
| (I/Pt) won't get side effects                              | -0.76 |
| ABX might have side effects                                | 0.84  |
| ABX don't have side effects                                | -0.77 |
| Don't know about ABX, but it might hurt/ ABX could hurt pt |       |
| It could hurt                                              |       |

---

**Antibiotics Help**

|                                 |       |
|---------------------------------|-------|
| Yes against germs               | 0.51  |
| No against germs                | -0.57 |
| (I/Pt) (don't/doesn't) need ABX | -0.44 |
| (I/Pt) need ABX                 | 0.52  |
| I know ABX help                 | 0.4   |
| I don't know if ABX help        |       |
| ABX will help                   |       |
| ABX might not help              | -0.52 |
| Symptoms go away with ABX       | 0.45  |

---

---

Symptoms don't go away with ABX

---

**Antibiotics Should be Taken for Strep Throat**

|               |       |
|---------------|-------|
| Yes for strep | 0.94  |
| No for strep  | -0.89 |

---

**The Doctor Doesn't Believe Me**

Doctor doesn't believe me/I don't believe pt

Doctor takes (me/pt) seriously

---

**Going to the ER Necessitates Antibiotics**

ER means ABX

ER doesn't mean ABX

---

*Note.* Factor loadings >0.40 are shown

Table S5

*Item Loadings Based on an Exploratory Factor Analysis of ED Patient Sample with Oblimin Rotation for 46 Survey Items*

| Item Short Form                                           | 1 (16%) | 2 (11%) | 3 (9%) | 4 (6%) |
|-----------------------------------------------------------|---------|---------|--------|--------|
| <b>Germs are Germs</b>                                    |         |         |        |        |
| Yes against viruses                                       |         |         |        | -0.76  |
| No against viruses                                        |         |         |        | 0.88   |
| Yes against bacteria                                      |         |         |        |        |
| No against bacteria                                       |         | 0.44    |        |        |
| Viral can turn into bacterial                             |         |         |        |        |
| Viral can't turn into bacterial                           |         |         |        |        |
| <b>Why Not Take a Risk? (Antibiotics Can't Hurt)</b>      |         |         |        |        |
| Don't know about ABX, but it can't hurt/ABX can't hurt pt | 0.74    |         |        |        |
| Might not help, but better safe than sorry                | 0.9     |         |        |        |
| Take ABX just in case                                     | 0.74    |         |        |        |
| ABX might help and can't hurt                             | 0.5     |         |        |        |

---

|                                       |      |
|---------------------------------------|------|
| It can't hurt                         | 0.5  |
| Better safe than sorry                | 0.83 |
| Might as well take a chance           | 0.73 |
| Better safe than sorry, so take ABX   | 0.81 |
| Might not work but why take a chance? | 0.49 |

---

**Antibiotics Don't Help**

|                                             |      |
|---------------------------------------------|------|
| Might not help, so better not to take ABX   | 0.68 |
| Don't take ABX if they don't make me better |      |
| ABX don't help and can hurt                 | 0.69 |
| ABX might not be safe                       | 0.8  |
| Should NOT take a chance                    | 0.53 |
| Better safe than sorry, so no ABX           | 0.68 |
| Might not work so why take ABX?             | 0.64 |

---

**Side Effects (Antibiotics Can Hurt)**

|                                               |       |
|-----------------------------------------------|-------|
| Don't know, but (I/pt) might get side effects | 0.56  |
| Don't know but (I/pt) won't get side effects  | -0.48 |

---

---

|                                                            |      |       |
|------------------------------------------------------------|------|-------|
| (I/Pt) might get side effects                              |      | 0.68  |
| (I/Pt) won't get side effects                              |      | -0.47 |
| ABX might have side effects                                |      | 0.62  |
| ABX don't have side effects                                |      | -0.58 |
| Don't know about ABX, but it might hurt/ ABX could hurt pt | 0.42 |       |
| It could hurt                                              |      |       |

---

**Antibiotics Help**

|                                 |      |      |
|---------------------------------|------|------|
| Yes against germs               |      |      |
| No against germs                |      | 0.43 |
| (I/Pt) (don't/doesn't) need ABX |      |      |
| (I/Pt) need ABX                 | 0.57 |      |
| I know ABX help                 | 0.58 |      |
| I don't know if ABX help        |      |      |
| ABX will help                   | 0.42 |      |
| ABX might not help              |      | 0.46 |
| Symptoms go away with ABX       |      |      |

---

---

|                                 |      |
|---------------------------------|------|
| Symptoms don't go away with ABX | 0.58 |
|---------------------------------|------|

---

**Antibiotics Should be Taken for Strep Throat**

Yes for strep

|              |      |
|--------------|------|
| No for strep | 0.45 |
|--------------|------|

---

**The Doctor Doesn't Believe Me**

Doctor doesn't believe me/I don't believe pt

Doctor takes (me/pt) seriously

---

**Going to the ER Necessitates Antibiotics**

ER means ABX

|                     |      |
|---------------------|------|
| ER doesn't mean ABX | 0.47 |
|---------------------|------|

---

*Note.* Factor loadings >0.40 are shown

Table S6

*Item Loadings Based on an Exploratory Factor Analysis of Provider Sample with Oblimin Rotation for 46 Survey Items*

| Item Short Form                                           | 1 (13%) | 2 (10%) | 3 (6%) | 4 (6%) |
|-----------------------------------------------------------|---------|---------|--------|--------|
| <b>Germs are Germs</b>                                    |         |         |        |        |
| Yes against viruses                                       |         |         |        |        |
| No against viruses                                        |         |         |        |        |
| Yes against bacteria                                      |         |         |        |        |
| No against bacteria                                       |         |         |        |        |
| Viral can turn into bacterial                             |         |         |        |        |
| Viral can't turn into bacterial                           |         |         |        |        |
| <b>Why Not Take a Risk? (Antibiotics Can't Hurt)</b>      |         |         |        |        |
| Don't know about ABX, but it can't hurt/ABX can't hurt pt |         | 0.45    |        |        |
| Might not help, but better safe than sorry                | 0.83    |         |        |        |
| Take ABX just in case                                     | 0.63    |         |        |        |
| ABX might help and can't hurt                             | 0.46    |         |        |        |
| It can't hurt                                             |         | 0.49    |        |        |

---

|                                       |      |
|---------------------------------------|------|
| Better safe than sorry                | 0.79 |
| Might as well take a chance           | 0.67 |
| Better safe than sorry, so take ABX   | 0.89 |
| Might not work but why take a chance? | 0.62 |

---

**Antibiotics Don't Help**

|                                             |       |
|---------------------------------------------|-------|
| Might not help, so better not to take ABX   | 0.55  |
| Don't take ABX if they don't make me better | 0.53  |
| ABX don't help and can hurt                 | -0.43 |
| ABX might not be safe                       | 0.6   |
| Should NOT take a chance                    | 0.48  |
| Better safe than sorry, so no ABX           | 0.52  |
| Might not work so why take ABX?             |       |

---

**Side Effects (Antibiotics Can Hurt)**

|                                               |       |
|-----------------------------------------------|-------|
| Don't know, but (I/pt) might get side effects | -0.45 |
| Don't know but (I/pt) won't get side effects  | 0.43  |
| (I/Pt) might get side effects                 | -0.79 |

---



---

|                                                            |       |
|------------------------------------------------------------|-------|
| (I/Pt) won't get side effects                              | 0.59  |
| ABX might have side effects                                | -0.65 |
| ABX don't have side effects                                | 0.57  |
| Don't know about ABX, but it might hurt/ ABX could hurt pt | -0.52 |
| It could hurt                                              | -0.73 |

---

**Antibiotics Help**

|                                 |       |
|---------------------------------|-------|
| Yes against germs               |       |
| No against germs                |       |
| (I/Pt) (don't/doesn't) need ABX | -0.55 |
| (I/Pt) need ABX                 | 0.46  |
| I know ABX help                 | 0.53  |
| I don't know if ABX help        |       |
| ABX will help                   | 0.62  |
| ABX might not help              |       |
| Symptoms go away with ABX       | 0.65  |
| Symptoms don't go away with ABX |       |

---

---

**Antibiotics Should be Taken for Strep Throat**

Yes for strep

No for strep

---

**The Doctor Doesn't Believe Me**

Doctor doesn't believe me/I don't believe pt

Doctor takes (me/pt) seriously

---

**Going to the ER Necessitates Antibiotics**

ER means ABX -0.46

ER doesn't mean ABX 0.48

---

*Note.* Factor loadings >0.40 are shown

Table S7

*Correlation values for each study in our sample.*

| Item Short Form                       | Study 1 (N=519) |           |          | Study 2 (N=225) |           |          | Study 3 (N=149) |            |          |
|---------------------------------------|-----------------|-----------|----------|-----------------|-----------|----------|-----------------|------------|----------|
|                                       | Age             | Education | Religion | Age             | Education | Religion | Age             | Experience | Religion |
| <b>Germes are Germes</b>              |                 |           |          |                 |           |          |                 |            |          |
| Yes against viruses                   | -0.10*          | -0.07     | 0.04     | 0.00            | -0.10     | 0.12     | 0.01            | -0.04      | -0.15    |
| No against viruses                    | 0.12**          | 0.10*     | -0.06    | -0.08           | 0.09      | -0.14    | 0.07            | 0.06       | -0.01    |
| Yes against bacteria                  | 0.04            | 0.08      | -0.02    | 0.07            | -0.06     | -0.01    | -0.12           | -0.12      | -0.15    |
| No against bacteria                   | -0.03           | -0.02     | 0.02     | -0.11           | -0.06     | 0.07     | 0.01            | 0.02       | 0.08     |
| Viral can turn into<br>bacterial      | -0.04           | -0.04     | 0.07     | 0.05            | -0.01     | 0.00     | -0.20*          | -0.16      | 0.10     |
| Viral can't turn into<br>bacterial    | -0.01           | 0.09*     | -0.08    | -0.09           | -0.04     | -0.08    | 0.10            | 0.03       | 0.03     |
| <b>Why Not Take a Risk?</b>           |                 |           |          |                 |           |          |                 |            |          |
| Don't know about<br>ABX, but it can't | -0.07           | -0.04     | -0.07    | -0.12           | -0.03     | 0.04     | -0.03           | -0.13      | -0.03    |

---

|                        |         |       |       |        |         |      |        |       |       |
|------------------------|---------|-------|-------|--------|---------|------|--------|-------|-------|
| hurt/ABX can't hurt    |         |       |       |        |         |      |        |       |       |
| pt                     |         |       |       |        |         |      |        |       |       |
| Might not help, but    | -0.10*  | -0.06 | -0.07 | -0.04  | -0.11   | 0.11 | -0.04  | -0.09 | -0.12 |
| better safe than sorry |         |       |       |        |         |      |        |       |       |
| Take ABX just in       | -0.10*  | -0.07 | -0.08 | -0.06  | -0.17** | 0.08 | -0.04  | -0.04 | -0.11 |
| case                   |         |       |       |        |         |      |        |       |       |
| ABX might help and     | -0.09*  | -0.04 | -0.06 | -0.07  | -0.12   | 0.09 | 0.09   | 0.00  | 0.01  |
| can't hurt             |         |       |       |        |         |      |        |       |       |
| It can't hurt          | -0.11*  | -0.04 | -0.07 | -0.15* | -0.05   | 0.02 | 0.26** | 0.06  | -0.07 |
| Better safe than       | -0.12** | -0.07 | -0.08 | -0.06  | -0.17** | 0.04 | 0.00   | -0.08 | -0.15 |
| sorry                  |         |       |       |        |         |      |        |       |       |
| Might as well take a   | -0.08   | -0.07 | -0.08 | -0.03  | -0.17*  | 0.09 | 0.02   | -0.04 | -0.09 |
| chance                 |         |       |       |        |         |      |        |       |       |
| Better safe than       | -0.10*  | -0.07 | -0.08 | -0.03  | -0.10   | 0.09 | -0.02  | -0.04 | -0.11 |
| sorry, so take ABX     |         |       |       |        |         |      |        |       |       |
| Might not work but     | -0.11** | -0.08 | -0.08 | -0.05  | -0.13   | 0.06 | 0.07   | -0.03 | -0.11 |

---

---

 why take a chance?

|                                                                     |      |      |      |       |      |       |       |       |      |
|---------------------------------------------------------------------|------|------|------|-------|------|-------|-------|-------|------|
| Don't know about<br>ABX, but it might<br>hurt/ ABX could<br>hurt pt | 0.03 | 0.04 | 0.08 | -0.10 | 0.03 | -0.06 | -0.07 | -0.01 | 0.10 |
|---------------------------------------------------------------------|------|------|------|-------|------|-------|-------|-------|------|

---

**Antibiotics Don't Help**

|                                                   |       |      |      |       |       |       |       |       |       |
|---------------------------------------------------|-------|------|------|-------|-------|-------|-------|-------|-------|
| Might not help, so<br>better not to take<br>ABX   | 0.03  | 0.05 | 0.05 | -0.07 | 0.05  | -0.12 | 0.11  | 0.17* | 0.12  |
| Don't take ABX if<br>they don't make me<br>better | 0.04  | 0.07 | 0.06 | -0.06 | 0.11  | -0.13 | 0.08  | 0.18* | -0.06 |
| ABX don't help and<br>can hurt                    | 0.01  | 0.01 | 0.06 | -0.08 | 0.11  | -0.05 | 0.06  | 0.12  | 0.15  |
| It could hurt                                     | 0.02  | 0.04 | 0.05 | -0.01 | -0.01 | -0.09 | -0.14 | -0.08 | 0.08  |
| ABX might not be                                  | -0.04 | 0.04 | 0.04 | -0.01 | 0.08  | -0.02 | -0.02 | 0.03  | -0.06 |

---



|                                 |       |       |       |        |       |       |        |       |        |
|---------------------------------|-------|-------|-------|--------|-------|-------|--------|-------|--------|
| (I/Pt) won't get side effects   | 0.00  | 0.05  | -0.06 | -0.02  | -0.12 | 0.07  | 0.11   | 0.09  | -0.17* |
| ABX might have side effects     | 0.00  | 0.00  | 0.10* | 0.00   | 0.10  | -0.06 | -0.16  | -0.05 | 0.10   |
| ABX don't have side effects     | 0.00  | 0.04  | -0.01 | 0.03   | -0.11 | 0.09  | 0.15   | 0.09  | -0.01  |
| <b>Antibiotics Help</b>         |       |       |       |        |       |       |        |       |        |
| Yes against germs               | -0.05 | 0.00  | -0.04 | -0.08  | -0.05 | 0.08  | -0.01  | -0.02 | -0.03  |
| No against germs                | -0.02 | 0.05  | 0.08  | 0.09   | -0.06 | -0.03 | 0.06   | 0.12  | -0.06  |
| (I/Pt) (don't/doesn't) need ABX | 0.07  | 0.05  | -0.04 | -0.15* | 0.05  | -0.05 | 0.25** | 0.19* | -0.03  |
| (I/Pt) need ABX                 | -0.03 | -0.04 | -0.06 | -0.04  | -0.10 | 0.08  | -0.10  | -0.11 | -0.12  |
| I know ABX help                 | -0.04 | -0.03 | -0.04 | 0.05   | -0.05 | 0.10  | -0.11  | -0.13 | 0.04   |
| I don't know if ABX help        | 0.06  | 0.08  | -0.02 | -0.06  | -0.09 | 0.05  | -0.15  | -0.13 | -0.10  |

|                                                     |       |       |       |       |       |       |        |         |       |
|-----------------------------------------------------|-------|-------|-------|-------|-------|-------|--------|---------|-------|
| ABX will help                                       | -0.04 | -0.02 | -0.02 | 0.05  | -0.01 | 0.05  | -0.19* | -0.22** | -0.02 |
| ABX might not help                                  | 0.04  | 0.09* | 0.07  | -0.04 | -0.02 | -0.05 | -0.13  | -0.05   | 0.11  |
| Symptoms go away<br>with ABX                        | -0.01 | -0.06 | -0.05 | 0.03  | 0.02  | 0.04  | -0.13  | -0.16   | 0.07  |
| Symptoms don't go<br>away with ABX                  | -0.04 | 0.02  | 0.10* | -0.10 | -0.04 | 0.11  | 0.19*  | 0.21*   | 0.14  |
| <b>Antibiotics Should be Taken for Strep Throat</b> |       |       |       |       |       |       |        |         |       |
| Yes for strep                                       | 0.07  | 0.07  | -0.05 | 0.01  | -0.07 | 0.02  | 0.05   | 0.13    | 0.07  |
| No for strep                                        | -0.05 | -0.06 | 0.02  | -0.07 | 0.07  | -0.07 | -0.05  | -0.01   | -0.10 |
| <b>The Doctor Doesn't Believe Me</b>                |       |       |       |       |       |       |        |         |       |
| Doctor doesn't<br>believe me/I don't<br>believe pt  | -0.03 | -0.04 | -0.07 | -0.05 | -0.03 | 0.08  | -0.05  | -0.02   | -0.02 |
| <b>Going to the ER Necessitates Antibiotics</b>     |       |       |       |       |       |       |        |         |       |
| Doctor takes (me/pt)<br>seriously                   | 0.06  | 0.05  | -0.04 | 0.16* | -0.12 | -0.01 | -0.11  | -0.07   | 0.04  |



---

|                 |                      |       |       |                      |       |       |      |       |       |
|-----------------|----------------------|-------|-------|----------------------|-------|-------|------|-------|-------|
| ER means ABX    | 0.24 <sup>***</sup>  | 0.05  | -0.05 | 0.00                 | 0.01  | -0.06 | 0.00 | 0.01  | 0.09  |
| ER doesn't mean | -0.31 <sup>***</sup> | -0.06 | 0.02  | -0.31 <sup>***</sup> | -0.07 | 0.02  | 0.05 | -0.03 | -0.12 |
| ABX             |                      |       |       |                      |       |       |      |       |       |

---

*Note.* \* =  $p < 0.05$ , \*\* =  $p < 0.01$ , \*\*\* =  $p < 0.001$ . ABX = antibiotics; Pt = patient.

Table S8  
*Correlations Between Oblimin Rotation Factors for Online Sample*

|   | 1     | 2     | 3     | 4     | 5    |
|---|-------|-------|-------|-------|------|
| 2 | -0.54 |       |       |       |      |
| 3 | 0.45  | -0.23 |       |       |      |
| 4 | -0.57 | 0.38  | -0.13 |       |      |
| 5 | 0.56  | -0.36 | 0.39  | -0.29 |      |
| 6 | 0.07  | -0.05 | -0.09 | -0.18 | 0.01 |

Table S9  
*Correlations Between Oblimin Rotation Factors for ED Patient Sample*

|   | 1     | 2     | 3    |
|---|-------|-------|------|
| 2 | -0.19 |       |      |
| 3 | -0.44 | -0.12 |      |
| 4 | -0.42 | 0.17  | 0.28 |

Table S10  
*Correlations Between Oblimin Rotation Factors for Provider Sample*

|   | 1     | 2     | 3     |
|---|-------|-------|-------|
| 2 | 0.47  |       |       |
| 3 | 0.44  | 0.11  |       |
| 4 | -0.24 | -0.05 | -0.18 |

Table S11

*Comparison of the Online Sample and US Census Demographic Data*

|                                               | Study 1 %<br>(N=519) | 2013 US Census %<br>(N=316,128,839) |
|-----------------------------------------------|----------------------|-------------------------------------|
| White                                         | 78                   | 78                                  |
| Black                                         | 8                    | 13                                  |
| American Indian and Alaskan Native            | 0                    | 1                                   |
| Asian                                         | 9                    | 5                                   |
| Native Hawaiian and Other Pacific<br>Islander | 0                    | 0                                   |
| Two or More Races                             | 4                    | 2                                   |

Table S12

*Best-Fitting Logistic Regression Model Predicting Prior Use of Antibiotics in Online Sample*

|                                                                            | $\beta$ | SE $\beta$ | OR   |     |
|----------------------------------------------------------------------------|---------|------------|------|-----|
| Significant Predictors After Controlling for Multiple Comparisons          |         |            |      |     |
| (Intercept)                                                                | -1.78   | 0.24       | 0.17 | *** |
| WNTAR                                                                      | 1.12    | 0.21       | 3.08 | *** |
| ABX Help                                                                   | 1.03    | 0.21       | 2.81 | *** |
| Asian Race                                                                 | 1.80    | 0.48       | 6.03 | *** |
| Strep                                                                      | 0.83    | 0.22       | 2.29 | *** |
| Model Variables Not Significant After Controlling for Multiple Comparisons |         |            |      |     |
| Strep:SE:ABX Don't Help                                                    | 0.88    | 0.28       | 2.42 | **  |
| Strep:ABX Don't Help:ABX Help                                              | 0.80    | 0.28       | 2.23 | **  |
| WNTAR:GAG:SE:ABX Help                                                      | -1.11   | 0.42       | 0.33 | **  |
| ABX Don't Help                                                             | -0.58   | 0.23       | 0.56 | *   |
| WNTAR:GAG:ABX Don't Help:ABX Help                                          | -0.97   | 0.38       | 0.38 | *   |
| GAG:SE:ABX Don't Help:ABX Help                                             | -1.02   | 0.40       | 0.36 | *   |

|                                   |       |      |      |   |
|-----------------------------------|-------|------|------|---|
| Strep:SE:ABX Help                 | 0.72  | 0.31 | 2.06 | * |
| GAG:Strep:SE                      | -0.69 | 0.30 | 0.50 | * |
| Strep:ABX Help                    | 0.56  | 0.25 | 1.75 | * |
| WNTAR:GAG:SE:ABX Don't Help       | -0.84 | 0.38 | 0.43 | * |
| WNTAR:GAG:ABX Don't Help          | 0.62  | 0.29 | 1.86 | * |
| WNTAR:Strep:SE                    | 0.78  | 0.37 | 2.18 | * |
| SE:ABX Don't Help                 | -0.56 | 0.27 | 0.57 | * |
| GAG:Strep:ABX Don't Help:ABX Help | -0.76 | 0.37 | 0.47 | * |
| WNTAR:GAG:Strep:ABX Don't Help    | 0.61  | 0.32 | 1.85 |   |
| SE:ABX Don't Help:ABX Help        | -0.60 | 0.32 | 0.55 |   |
| WNTAR:Strep:SE:ABX Don't Help     | 0.62  | 0.36 | 1.86 |   |
| Religion                          | 0.16  | 0.10 | 1.18 |   |
| ABX Don't Help:ABX Help           | -0.40 | 0.25 | 0.67 |   |
| GAG:Strep                         | -0.28 | 0.23 | 0.76 |   |
| WNTAR:GAG:ABX Help                | 0.39  | 0.33 | 1.47 |   |
| WNTAR:GAG:Strep                   | 0.35  | 0.31 | 1.42 |   |

|                               |       |      |      |
|-------------------------------|-------|------|------|
| WNTAR:Strep                   | -0.32 | 0.28 | 0.73 |
| GAG:ABX Don't Help:ABX Help   | 0.38  | 0.33 | 1.46 |
| GAG:SE                        | -0.30 | 0.27 | 0.74 |
| WNTAR:SE:ABX Don't Help       | 0.33  | 0.30 | 1.39 |
| Strep:SE                      | -0.28 | 0.25 | 0.76 |
| WNTAR:GAG                     | 0.28  | 0.26 | 1.32 |
| GAG:Strep:ABX Don't Help      | 0.28  | 0.29 | 1.33 |
| WNTAR:ABX Don't Help:ABX Help | 0.26  | 0.28 | 1.30 |
| SE:ABX Help                   | -0.22 | 0.24 | 0.80 |
| Black/African America Race    | -0.58 | 0.62 | 0.56 |
| WNTAR:ABX Help                | 0.23  | 0.25 | 1.26 |
| Mixed/Other Race              | 0.71  | 0.79 | 2.03 |
| GAG:ABX Don't Help            | -0.22 | 0.26 | 0.80 |
| SE                            | -0.18 | 0.22 | 0.83 |
| GAG:SE:ABX Don't Help         | 0.23  | 0.33 | 1.26 |
| GAG:SE:ABX Help               | 0.20  | 0.31 | 1.22 |



|                            |       |      |      |
|----------------------------|-------|------|------|
| Strep:ABX Don't Help       | -0.12 | 0.24 | 0.89 |
| WNTAR:ABX Don't Help       | 0.12  | 0.25 | 1.13 |
| WNTAR:Strep:ABX Don't Help | 0.08  | 0.31 | 1.08 |
| GAG:ABX Help               | -0.06 | 0.25 | 0.94 |
| WNTAR:SE:ABX Help          | -0.06 | 0.31 | 0.94 |
| GAG:Strep:ABX Help         | -0.05 | 0.29 | 0.95 |
| WNTAR:SE                   | -0.03 | 0.26 | 0.97 |
| GAG                        | 0.02  | 0.21 | 1.02 |
| WNTAR:GAG:SE               | -0.02 | 0.36 | 0.98 |

---

*Note.* \*\*\* =  $p < 0.001$ ; \*\* =  $p < 0.01$ , Not significant after controlling for multiple comparisons using the Holm-Bonferroni procedure; \* =  $p < 0.05$ , Not significant after controlling for multiple comparisons using the Holm-Bonferroni procedure.  $\beta$  = Logistic regression coefficient. SE  $\beta$  = Standard Error of  $\beta$ . OR = Odds Ratio. WNTAR = Why Not Take a Risk?, GAG = Germs are Germs, SE = Side Effects, ABX = Antibiotics. Strep = Correct Knowledge of Strep Throat. “:” indicates an interaction term.

Table S13

*Best-Fitting Logistic Regression Model Predicting Expectations for Antibiotics in Online Sample*

|                                                                            | $\beta$ | SE $\beta$ | OR   |     |
|----------------------------------------------------------------------------|---------|------------|------|-----|
| Significant Predictors After Controlling for Multiple Comparisons          |         |            |      |     |
| (Intercept)                                                                | -0.92   | 0.16       | 0.40 | *** |
| WNTAR                                                                      | 0.69    | 0.12       | 1.99 | *** |
| Strep                                                                      | 0.61    | 0.14       | 1.85 | *** |
| ABX Help                                                                   | 0.58    | 0.13       | 1.79 | *** |
| ABX Don't Help                                                             | -0.58   | 0.14       | 0.56 | *** |
| Model Variables Not Significant After Controlling for Multiple Comparisons |         |            |      |     |
| Asian Race                                                                 | 1.25    | 0.39       | 3.48 | **  |
| Strep:SE                                                                   | -0.40   | 0.14       | 0.67 | **  |
| Religion                                                                   | 0.13    | 0.08       | 1.14 |     |
| Mixed/Other Race                                                           | 0.60    | 0.60       | 1.82 |     |
| Black/African America Race                                                 | -0.36   | 0.47       | 0.70 |     |
| SE                                                                         | -0.01   | 0.13       | 0.99 |     |

---

*Note. \*\*\* =  $p < 0.001$ ; \*\* =  $p < 0.01$ , Not significant after controlling for multiple comparisons using the Holm-Bonferroni procedure.  $\beta$  = Logistic regression coefficient. SE  $\beta$  = Standard Error of  $\beta$ . OR = Odds Ratio. WNTAR = Why Not Take a Risk?, GAG = Germs are Germs, SE = Side Effects, ABX = Antibiotics*
